# Supplementary material for: A robust and light-weight transfer learning-based architecture for accurate detection of leaf diseases across multiple plants using less amount of images
Source: Frontiers journal article supplement (doi:10.3389/fpls.2023.1321877), 2024-01-11
Supplement: Data_Sheet_1.PDF [file Data_Sheet_1.PDF]

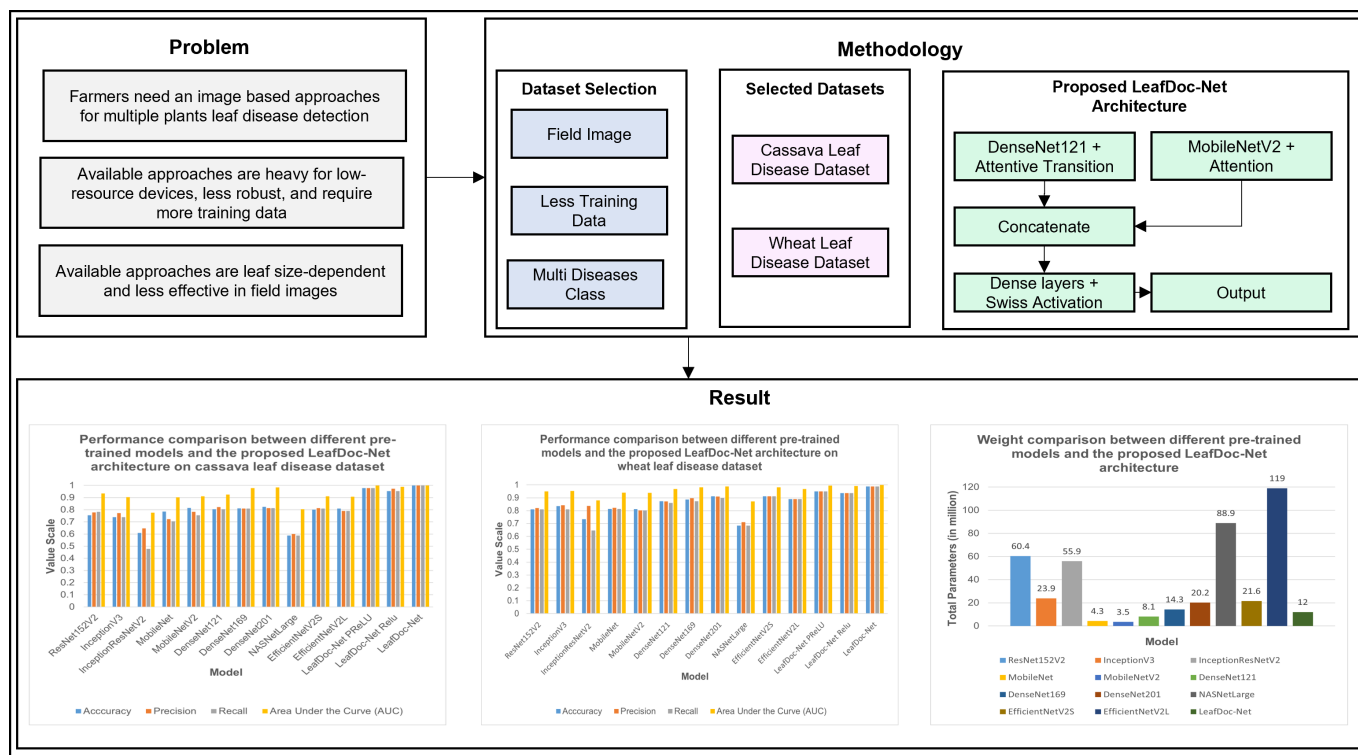

**Figure S1.** A visual representation of the problems, the methodology, and the results.
